# Supplementary material for: Worthless and Nutritive Nuptial Gifts: Mating Duration, Sperm Stored and Potential Female Decisions in Spiders
Source: PubMed Central journal article supplement (PMC4480359; doi:10.1371/journal.pone.0129453), 2015-06-24
Supplement: pone.0129453.s001.pdf [file pone.0129453.s001.pdf]

(A)

| N            | Group         | Mating duration (min) | 1-Long pedipalp insertions<br>0-short pedipalp insertions | No. sperm stored |
|--------------|---------------|-----------------------|-----------------------------------------------------------|------------------|
| 1            | FG            |                       | 0                                                         | 29812,5          |
| 2            | FG            | 0,8                   | 1                                                         | 54187,5          |
| 3            | FG            | 1                     | 1                                                         | 56343,75         |
| 4            | FG            | 1,7                   | 1                                                         | 42750            |
| 5            | FG            | 0,7                   | 1                                                         | 34500            |
| 6            | FG            | 0,4                   | 1                                                         | 31312,5          |
| 7            | FG            | 0,2                   | 1                                                         | 15562,5          |
| 8            | FG            |                       | 0                                                         | 11062,5          |
| 9            | FG            | 0,3                   | 1                                                         | 27375            |
| 10           | FG            |                       | 0                                                         | 15000            |
| 11           | FG            | 0,5                   | 1                                                         | 24375            |
| 12           | FG            | 1,3                   | 1                                                         | 45562,5          |
| 13           | FG            |                       | 0                                                         | 12750            |
| 14           | FG            | 0,9                   | 1                                                         | 43687,5          |
| 15           | FG            | 0,5                   | 1                                                         | 41062,5          |
| 16           | FG            | 0,6                   | 1                                                         | 30937,5          |
| 17           | FG            | 0,7                   | 1                                                         | 12750            |
| 18           | FG            | 0,3                   | 1                                                         | 24937,5          |
| 19           | FG            |                       | 0                                                         | 16500            |
| 20           | FG            | 0,7                   | 1                                                         | 55687,5          |
| 21           | FG            | 0,4                   | 0                                                         | 18562,5          |
| 22           | FG            | 1,2                   | 1                                                         | 21937,5          |
| 1            | WG            |                       | 0                                                         | 16687,5          |
| 2            | WG            | 1,5                   | 1                                                         | 47250            |
| 3            | WG            | 0,8                   | 1                                                         | 35437,5          |
| 4            | WG            | 0,7                   | 0                                                         | 7500             |
| 5            | WG            | 0,7                   | 1                                                         | 30187,5          |
| 6            | WG            | 1,2                   | 1                                                         | 39375            |
| 7            | WG            | 0,8                   | 1                                                         | 46312,5          |
| 8            | WG            | 1                     | 1                                                         | 60750            |
| 9            | WG            | 1,1                   | 1                                                         | 30000            |
| 10           | WG            | 0,7                   | 1                                                         | 38437,5          |
| 11           | WG            | 1,1                   | 1                                                         | 41625            |
| 12           | WG            | 1,7                   | 1                                                         | 34125            |
| 13           | WG            | 0,4                   | 1                                                         | 14250            |
| 14           | WG            | 1,5                   | 1                                                         | 15750            |
| 15           | WG            | 0,7                   | 1                                                         | 11625            |
| 16           | WG            | 1,1                   | 1                                                         | 49500            |
| 17           | WG            | 0,8                   | 1                                                         | 27937,5          |
| <b>Total</b> | <b>N = 39</b> |                       |                                                           |                  |

**(B)**

| <b>N</b>     | <b>Group</b>  | <b>Mating duration (min)</b> | <b>1-Long pedipalp insertions<br/>0-short pedipalp insertions</b> | <b>No. sperm stored</b> |
|--------------|---------------|------------------------------|-------------------------------------------------------------------|-------------------------|
| 1            | FG-1          |                              | 0                                                                 | 17437,5                 |
| 2            | FG-1          | 0,3                          | 1                                                                 | 18187,5                 |
| 3            | FG-1          | 0,3                          | 1                                                                 | 53250                   |
| 4            | FG-1          | 0,5                          | 1                                                                 | 29625                   |
| 5            | FG-1          | 0,4                          | 1                                                                 | 25500                   |
| 6            | FG-1          | 0,3                          | 1                                                                 | 20062,5                 |
| 7            | FG-1          | 0,3                          | 1                                                                 | 19687,5                 |
| 8            | FG-1          | 0,8                          | 1                                                                 | 32250                   |
| 9            | FG-1          | 0,6                          | 1                                                                 | 10125                   |
| 10           | FG-1          | 0,4                          | 1                                                                 | 33750                   |
| 11           | FG-1          | 0,4                          | 1                                                                 | 17250                   |
| 12           | FG-1          | 0,3                          | 1                                                                 | 13500                   |
| 13           | FG-1          | 0,7                          | 1                                                                 | 11437,5                 |
| 14           | FG-1          | 0,3                          | 1                                                                 | 19125                   |
| 15           | FG-1          | 0,4                          | 1                                                                 | 30750                   |
| 16           | FG-1          | 0,2                          | 1                                                                 | 1125                    |
| 17           | FG-1          |                              | 0                                                                 | 11250                   |
| 18           | FG-1          | 0,1                          | 1                                                                 | 562,5                   |
| 19           | FG-1          | 0,3                          | 1                                                                 | 11250                   |
| 1            | NG-1          |                              | 0                                                                 | 15937,5                 |
| 2            | NG-1          |                              | 1                                                                 | 24562,5                 |
| 3            | NG-1          | 0,8                          | 1                                                                 | 68812,5                 |
| 4            | NG-1          |                              | 0                                                                 | 48750                   |
| 5            | NG-1          | 0,4                          | 1                                                                 | 42375                   |
| 6            | NG-1          | 0,5                          | 1                                                                 | 24187,5                 |
| 7            | NG-1          | 0,3                          | 1                                                                 | 23250                   |
| 8            | NG-1          | 0,1                          | 1                                                                 | 16875                   |
| 9            | NG-1          | 0,7                          | 1                                                                 | 31687,5                 |
| 10           | NG-1          | 0,5                          | 1                                                                 | 24562,5                 |
| 11           | NG-1          | 0,4                          | 1                                                                 | 13875                   |
| 12           | NG-1          |                              | 0                                                                 | 24000                   |
| 13           | NG-1          |                              | 0                                                                 | 12000                   |
| 14           | NG-1          |                              | 0                                                                 | 3937,5                  |
| 15           | NG-1          |                              | 0                                                                 | 8250                    |
| 16           | NG-1          | 0,7                          | 1                                                                 | 36656,25                |
| 17           | NG-1          | 0,3                          | 1                                                                 | 8062,5                  |
| 18           | NG-1          |                              | 0                                                                 | 16125                   |
| 19           | NG-1          | 0,1                          | 1                                                                 | 19781,25                |
| 20           | NG-1          |                              | 0                                                                 | 16687,5                 |
| 21           | NG-1          |                              | 0                                                                 | 10312,5                 |
| 22           | NG-1          |                              | 0                                                                 | 5812,5                  |
| 23           | NG-1          | 0,2                          | 1                                                                 | 24375                   |
| 24           | NG-1          | 0,1                          | 1                                                                 | 3937,5                  |
| <b>Total</b> | <b>N = 43</b> |                              |                                                                   |                         |
